# Supplementary material for: New Dammarane-Type Saponins from Gynostemma pentaphyllum
Source: PubMed Central journal article supplement (PMC6480664; doi:10.3390/molecules24071375), 2019-04-08
Supplement: molecules-24-01375-s001.pdf [file molecules-24-01375-s001.pdf]

## Supporting Information

# New Dammarane-type Triterpene Saponins from *Gynostemma pentaphyllum* (Jiaogulan)

Po-Yen Chen <sup>1,2,†</sup>, Chih-Chao Chang <sup>1,†</sup>, Hui-Chi Huang <sup>3,†</sup>, Li-Jie Zhang <sup>1</sup>, Chia-Ching Liaw <sup>4</sup>, Yu-Chi Lin <sup>1</sup>, Nham-Linh Nguyen <sup>1,5</sup>, Thanh-Hoa Vo <sup>1,5</sup>, Yung-Yi Cheng <sup>6,7</sup>, Susan L. Morris-Natschke <sup>6</sup>, Kuo-Hsiung Lee <sup>6,7,\*</sup>, and Yao-Haur Kuo <sup>1,5,8,\*</sup>

<sup>1</sup> Division of Chinese Materia Medica Development, National Research Institute of Chinese Medicine, Taipei 112, Taiwan; peik35@gmail.com (P.Y.C.); changhcym@gmail.com (C.C.C.); lijizhang@hotmail.com (L.J.Z.); m8952612@hotmail.com (Y.C.L.); kuoyh@nricm.edu.tw (Y.H.K.)

<sup>2</sup> Department of Life Sciences and Institute of Genome Sciences, National Yang-Ming University, Taipei 112, Taiwan

<sup>3</sup> Department of Chinese Pharmaceutical Sciences and Chinese Medicine Resources, China Medical University, Taichung 404, Taiwan; hchuang@mail.cmu.edu.tw

<sup>4</sup> Department of Research and Development, Starsci Biotech Co. Ltd., Taipei 112, Taiwan; biogodas@hotmail.com

<sup>5</sup> The Ph.D. program in Clinical Drug Development of Chinese Herbal Medicine, College of Pharmacy, Taipei Medical University, Taipei 11031, Taiwan; nguyenlinhnham4201@gmail.com (N.L.N.); hoavo0808@gmail.com (T.H.V.)

<sup>6</sup> Natural Products Research Laboratories, Eshelman School of Pharmacy, University of North Carolina, Chapel Hill, NC 27599-7568, USA; susan\_natschke@unc.edu (S.L.M.); khlee@unc.edu (K.H.L.); yungyi@email.unc.edu (Y.Y.C.)

<sup>7</sup> Chinese Medicine Research and Development Center, China Medical University and Hospital, Taichung 40402, Taiwan

<sup>8</sup> Graduate Institute of Integrated Medicine, College of Chinese Medicine, China Medical University, Taichung 404, Taiwan

\* Correspondence: kuoyh@nricm.edu.tw (Y.H.K.), Tel.: +886-2-2820-1999 ext. 7061; yhlee@unc.edu (K.H.L.), +919-962-0066.

† These authors contributed equally to this work.

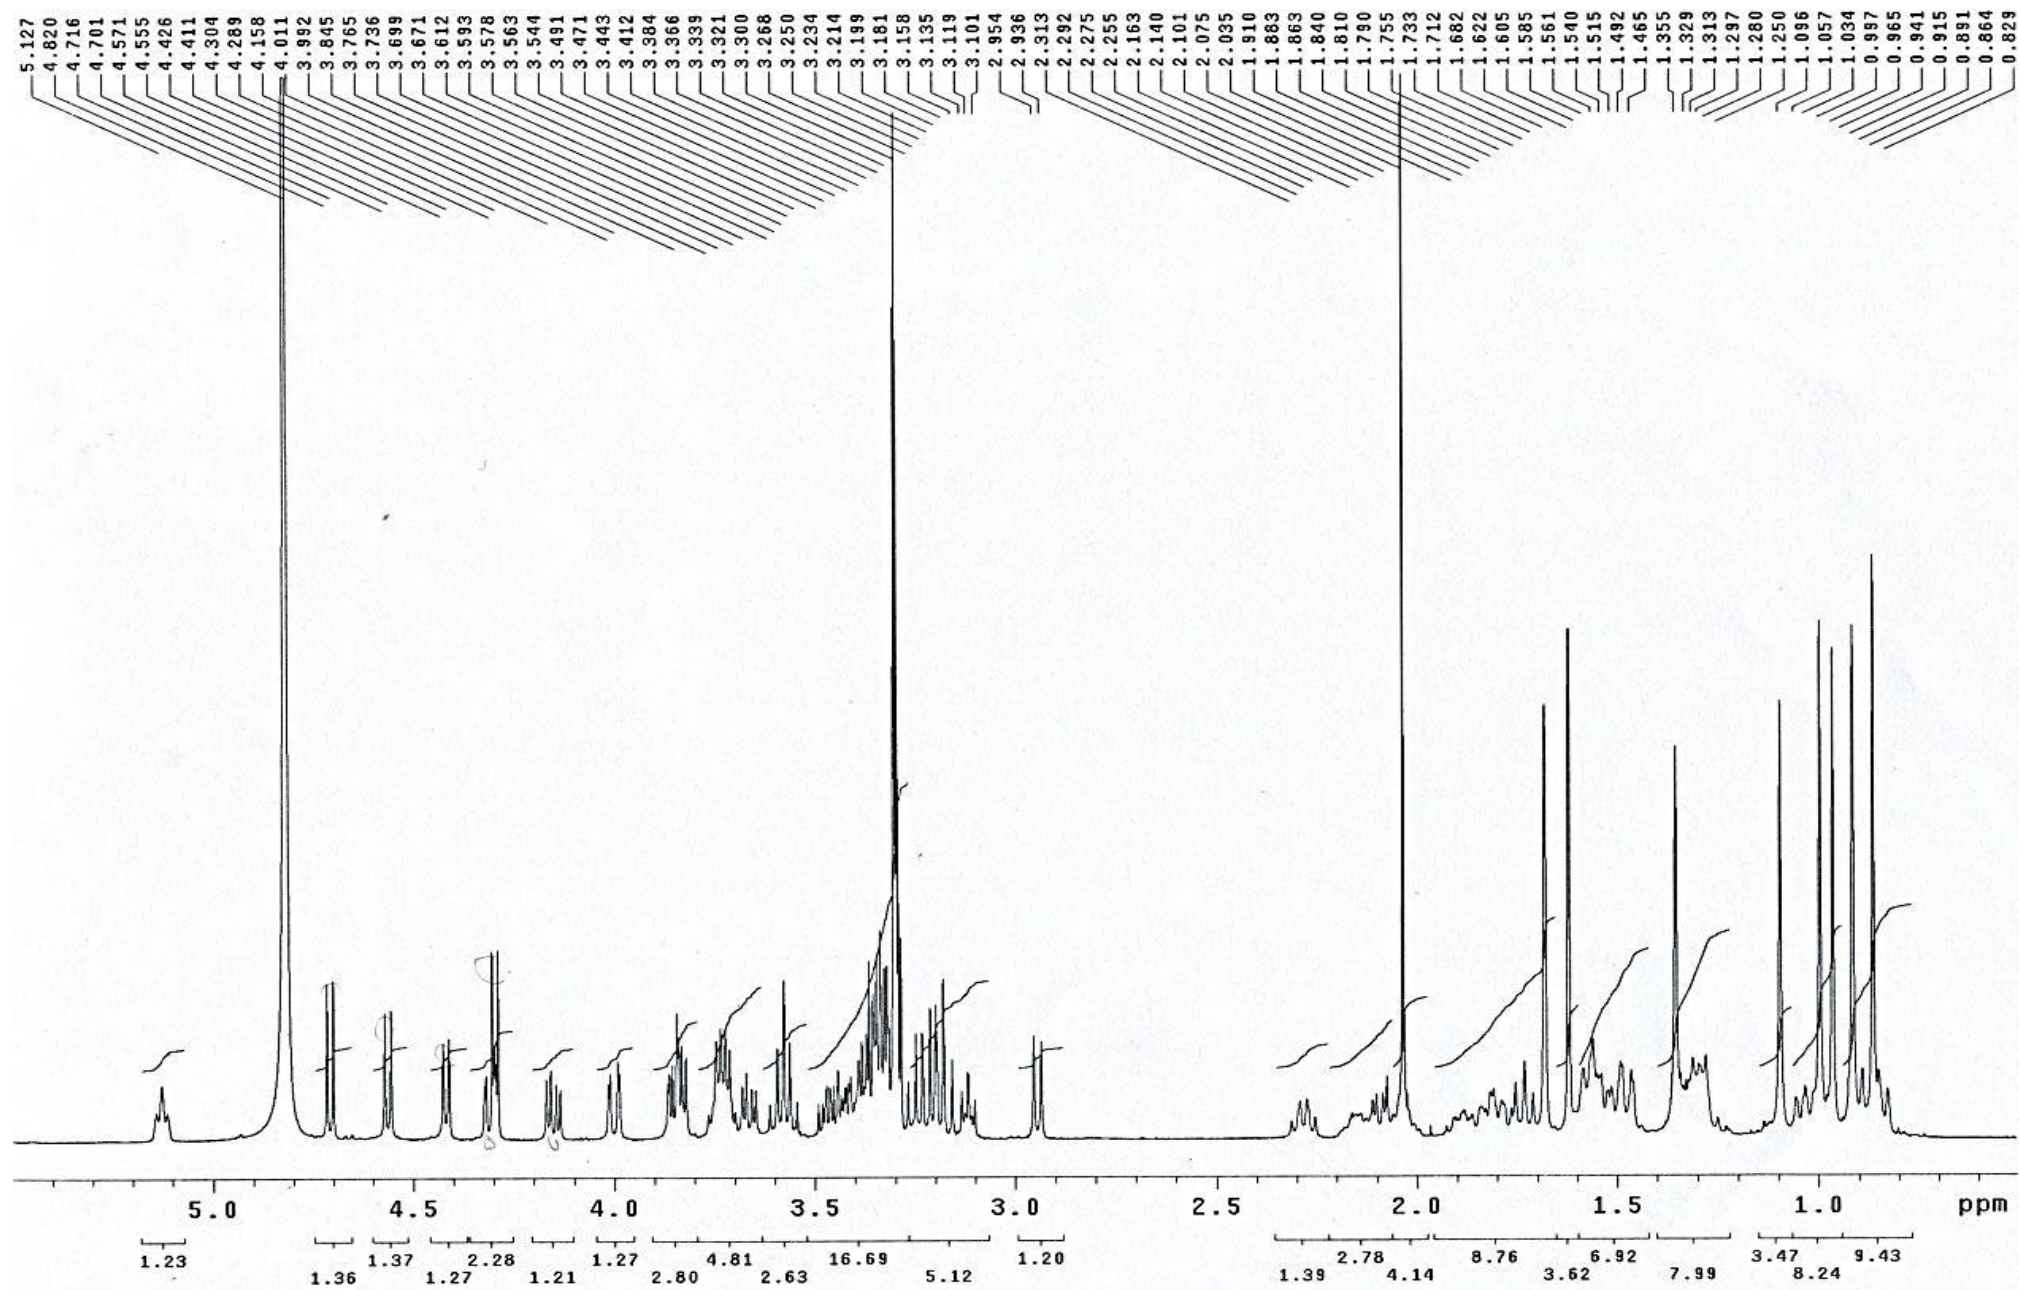

**Figure S1.** The  $^1\text{H-NMR}$  spectrum of Gyenoside CP1 (1) (500 MHz in methanol- $d_4$ )

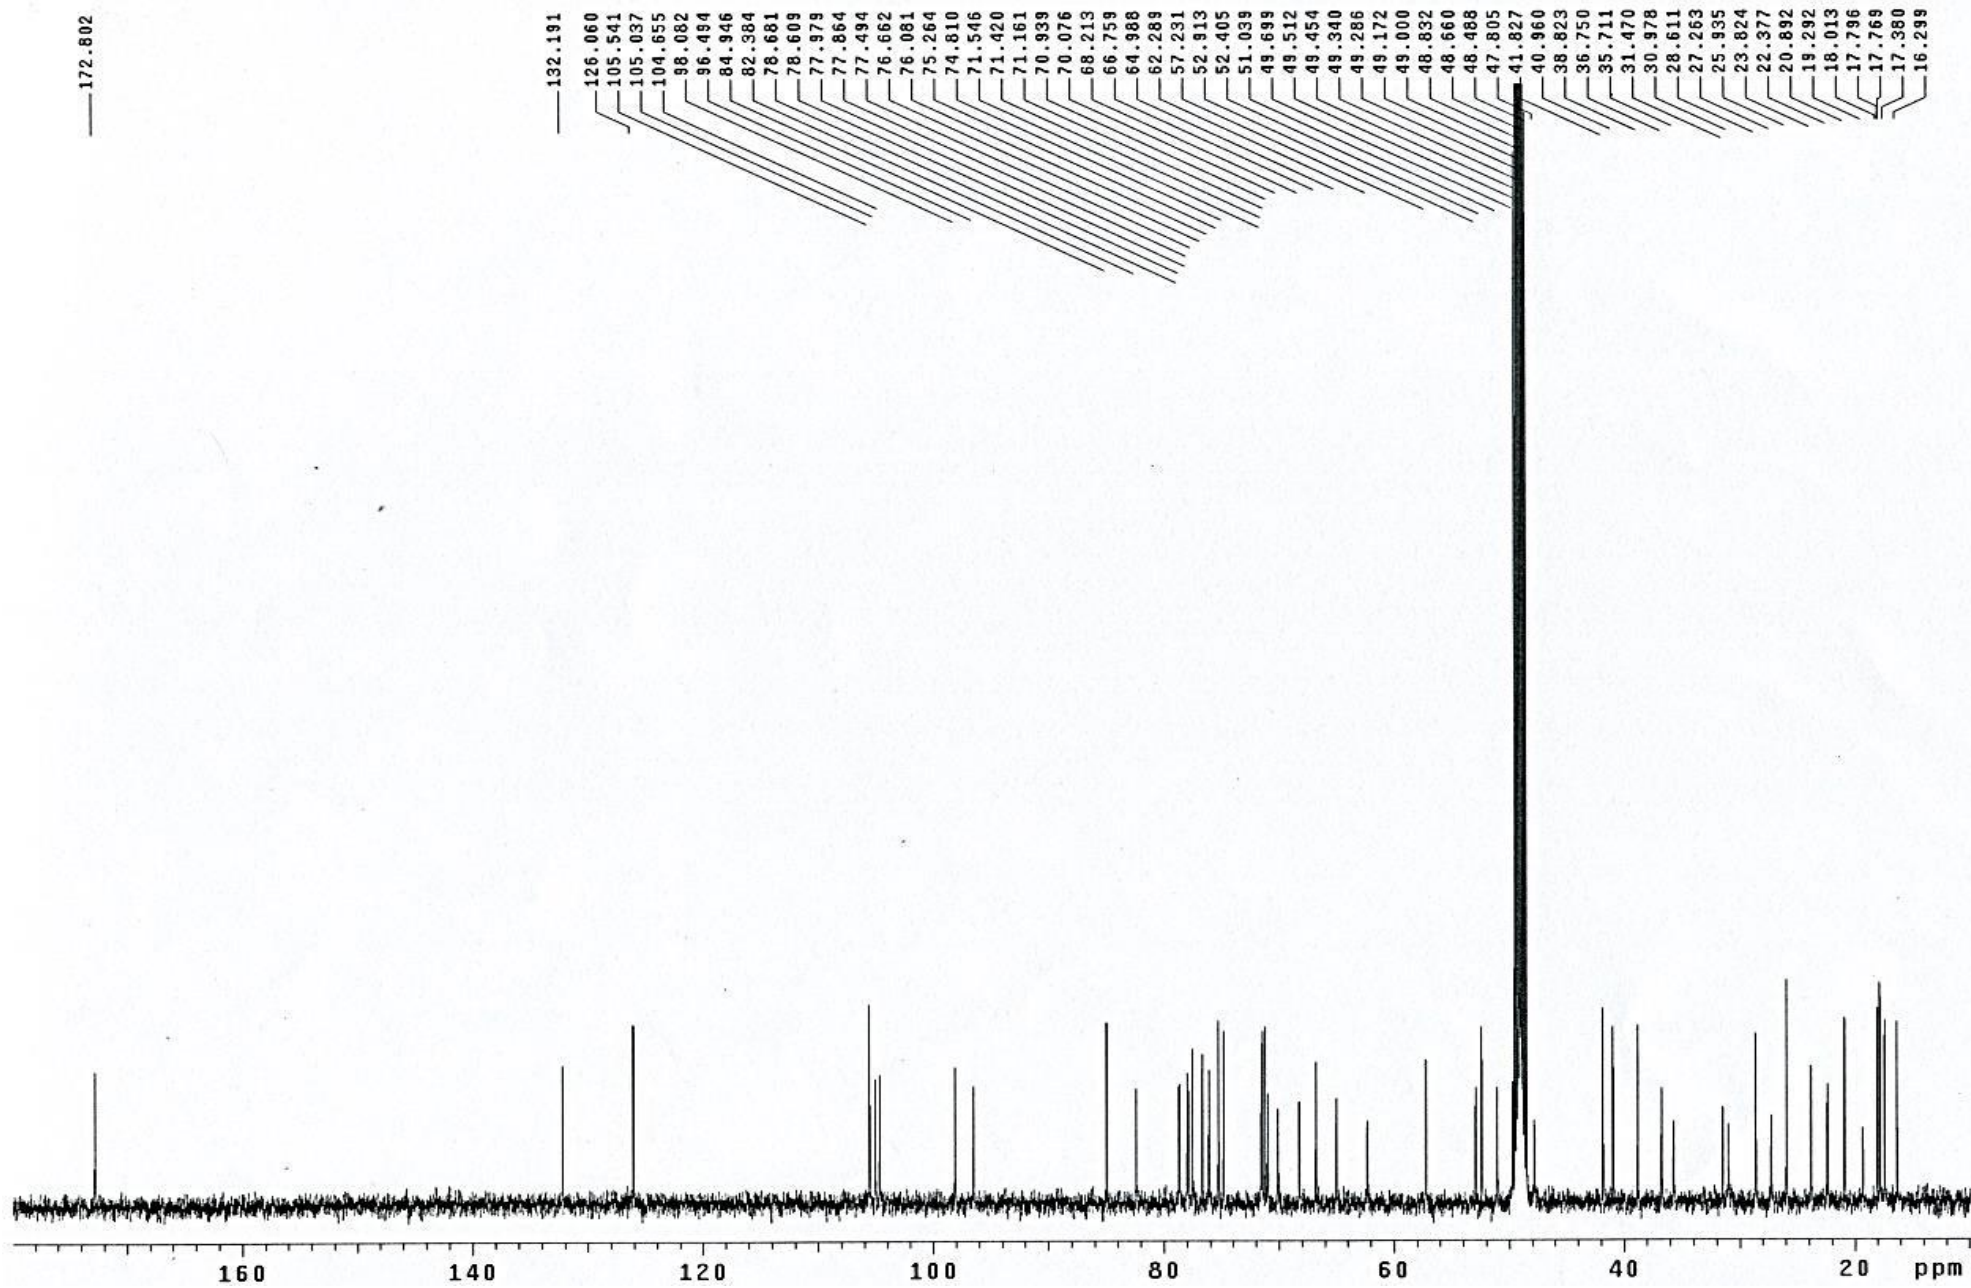

Figure S2. The  $^{13}\text{C}$ -NMR spectrum of Gyenoside CP1 (**1**) (125 MHz in methanol- $d_4$ )

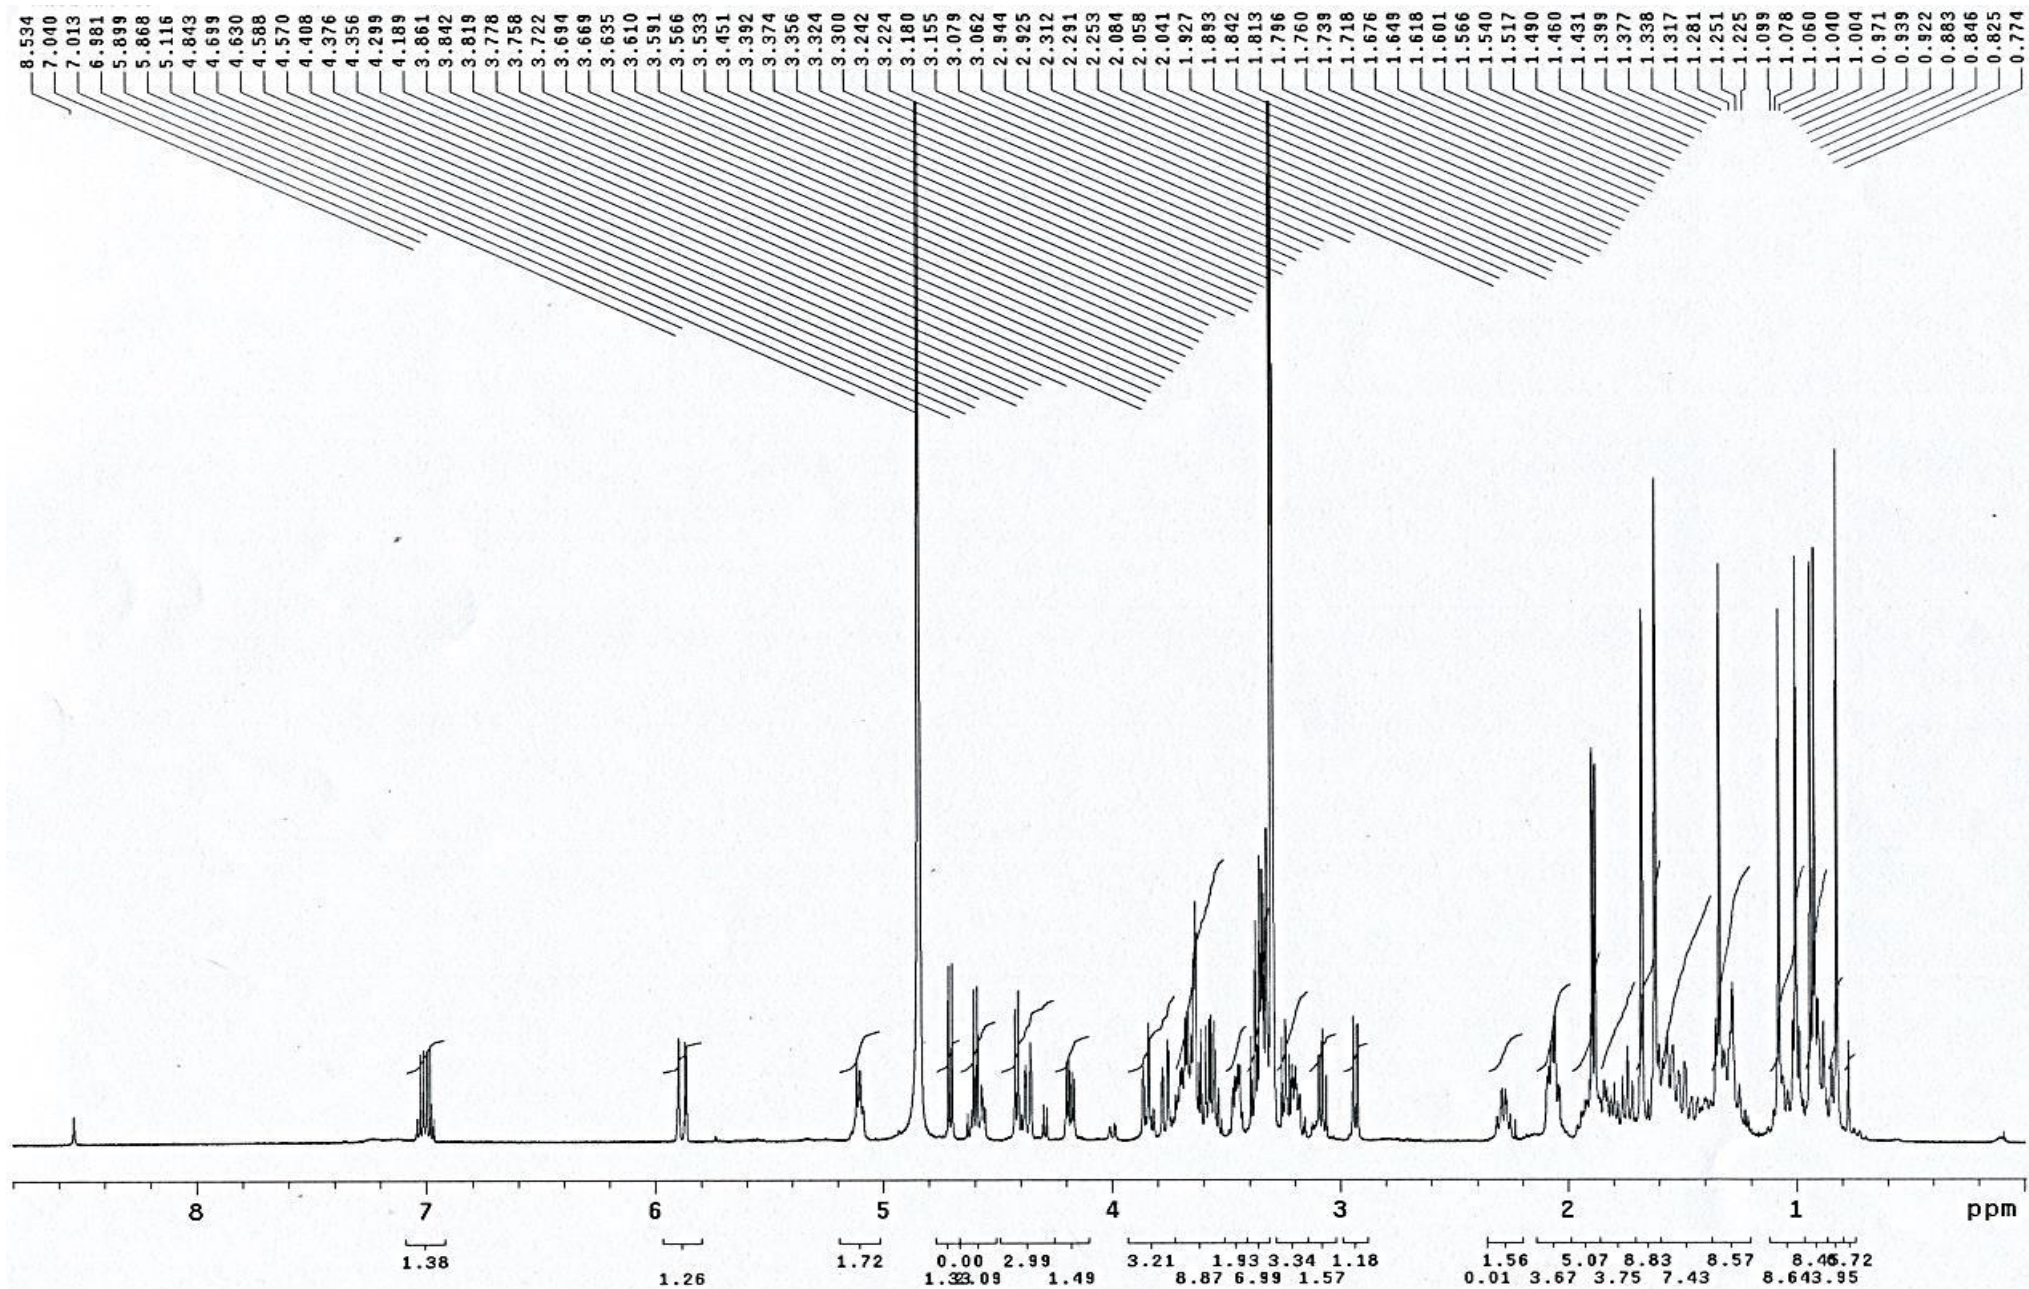

**Figure S3.** The  $^1\text{H}$ -NMR spectrum of Gyenoside CP2 (**2**) (500 MHz in methanol- $d_4$ )

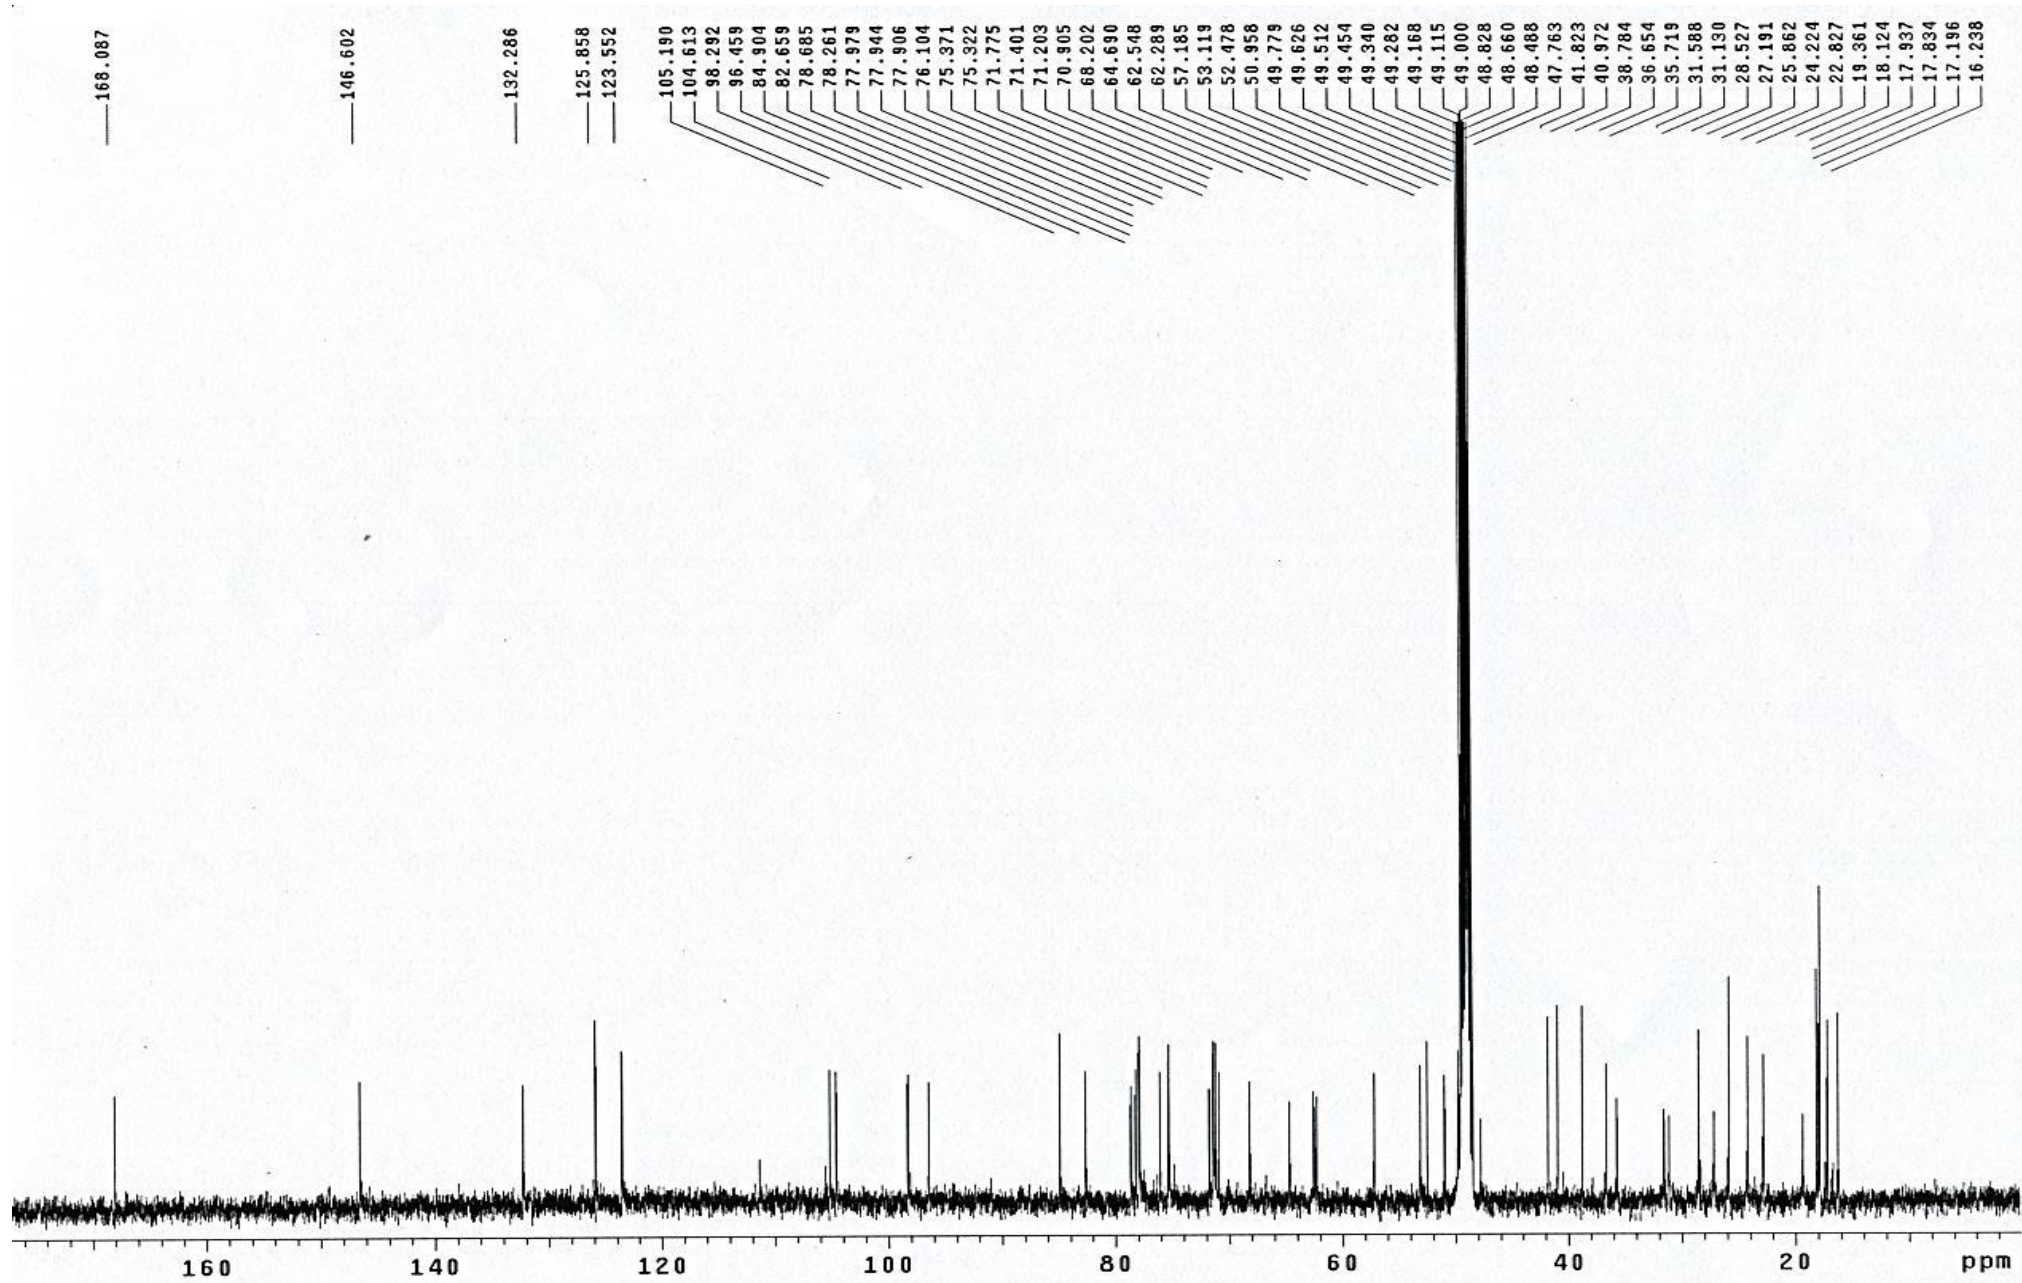

**Figure S4.** The  $^{13}\text{C}$ -NMR spectrum of Gyenoside CP2 (**2**) (125 MHz in methanol- $d_4$ )

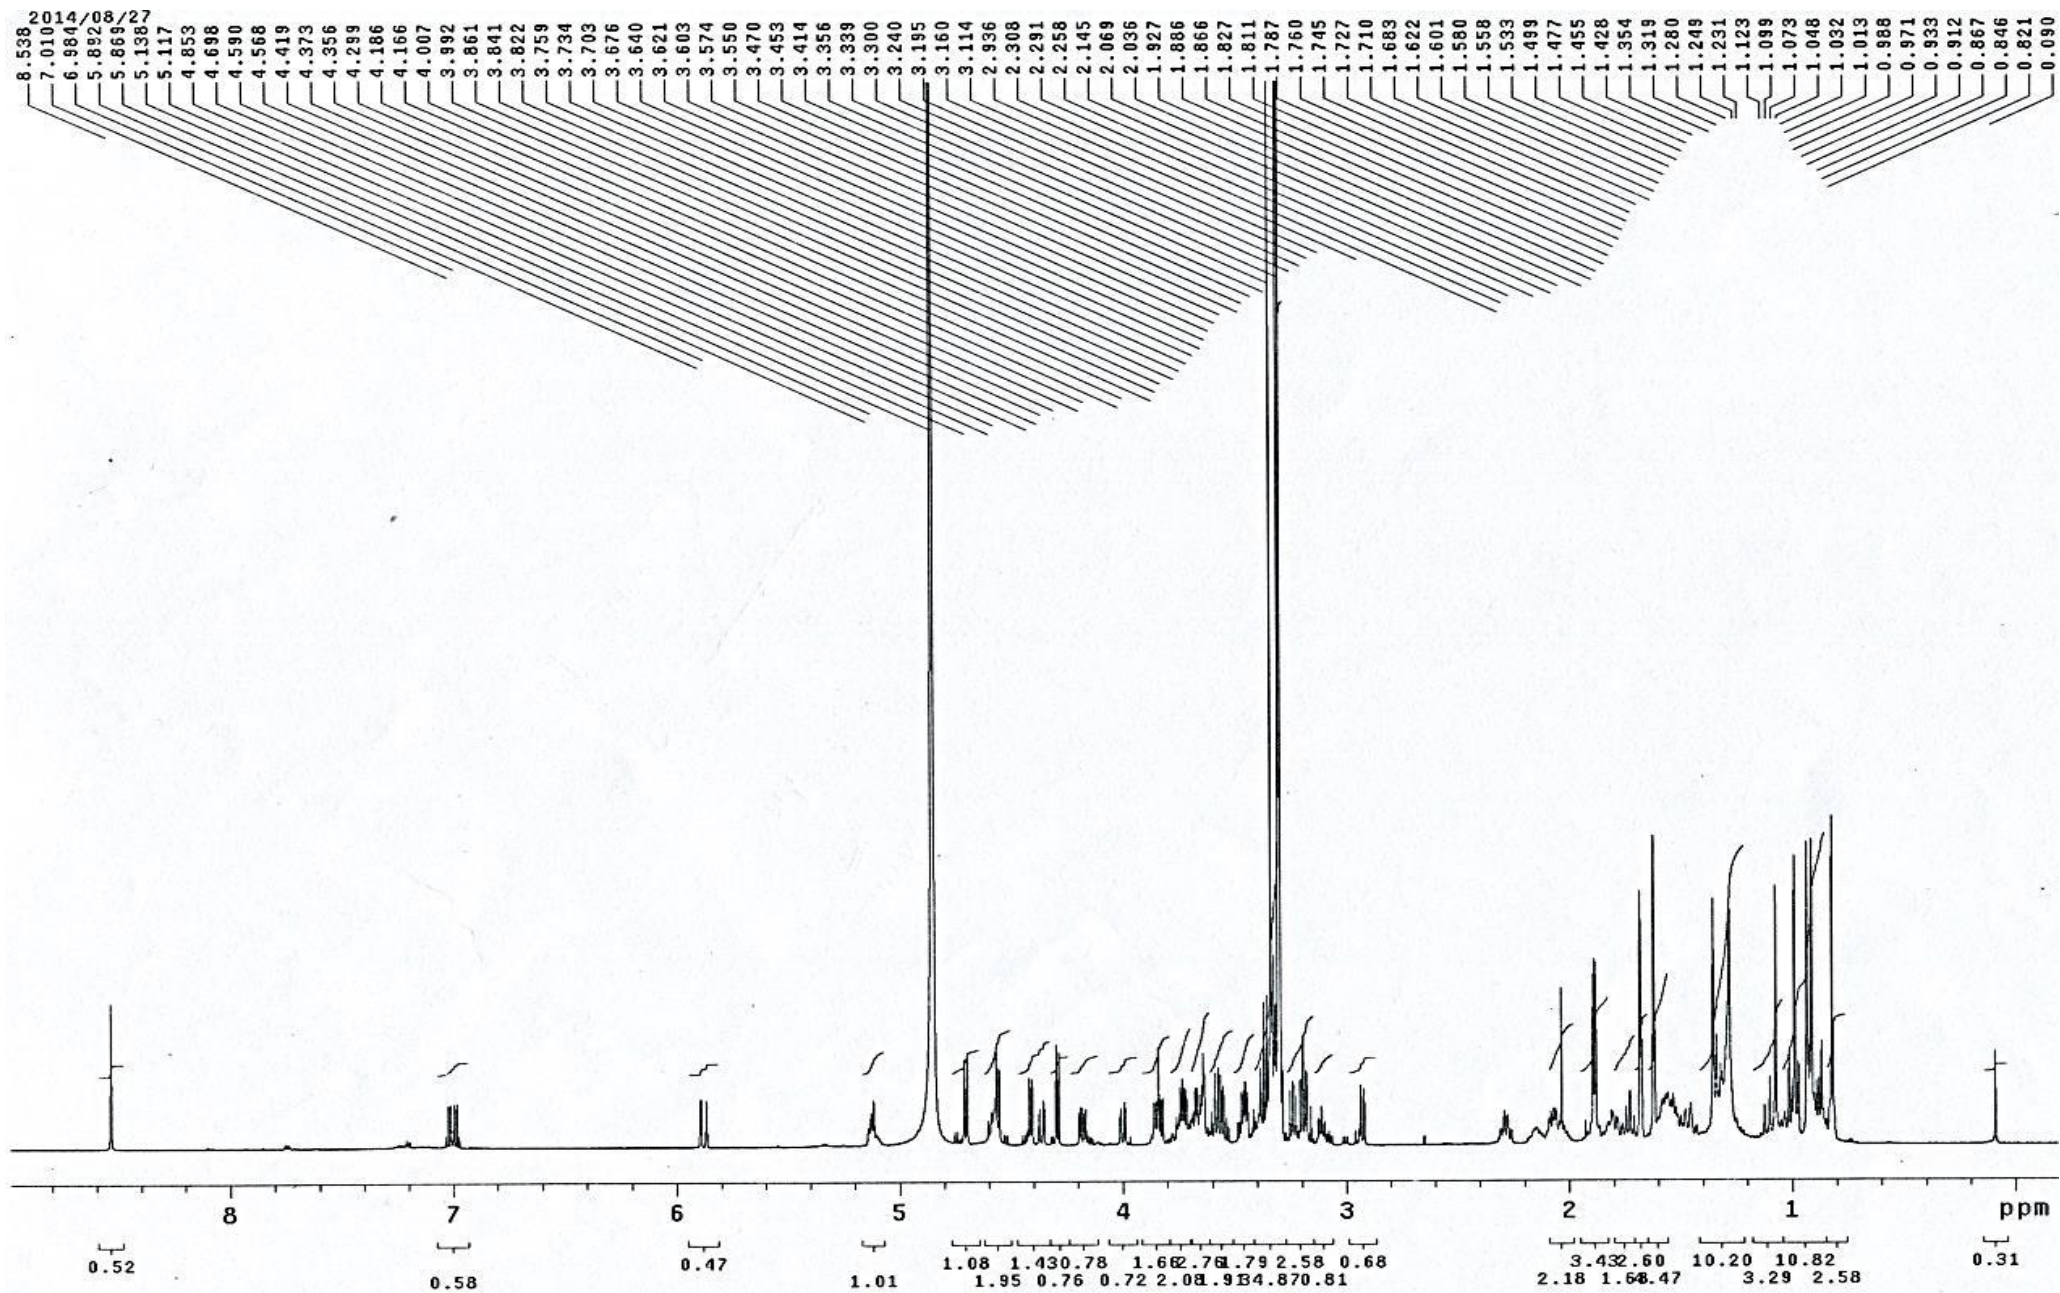

**Figure S5.** The  $^1\text{H}$ -NMR spectrum of Gyenoside CP3 (**3**) (600 MHz in methanol- $d_4$ )

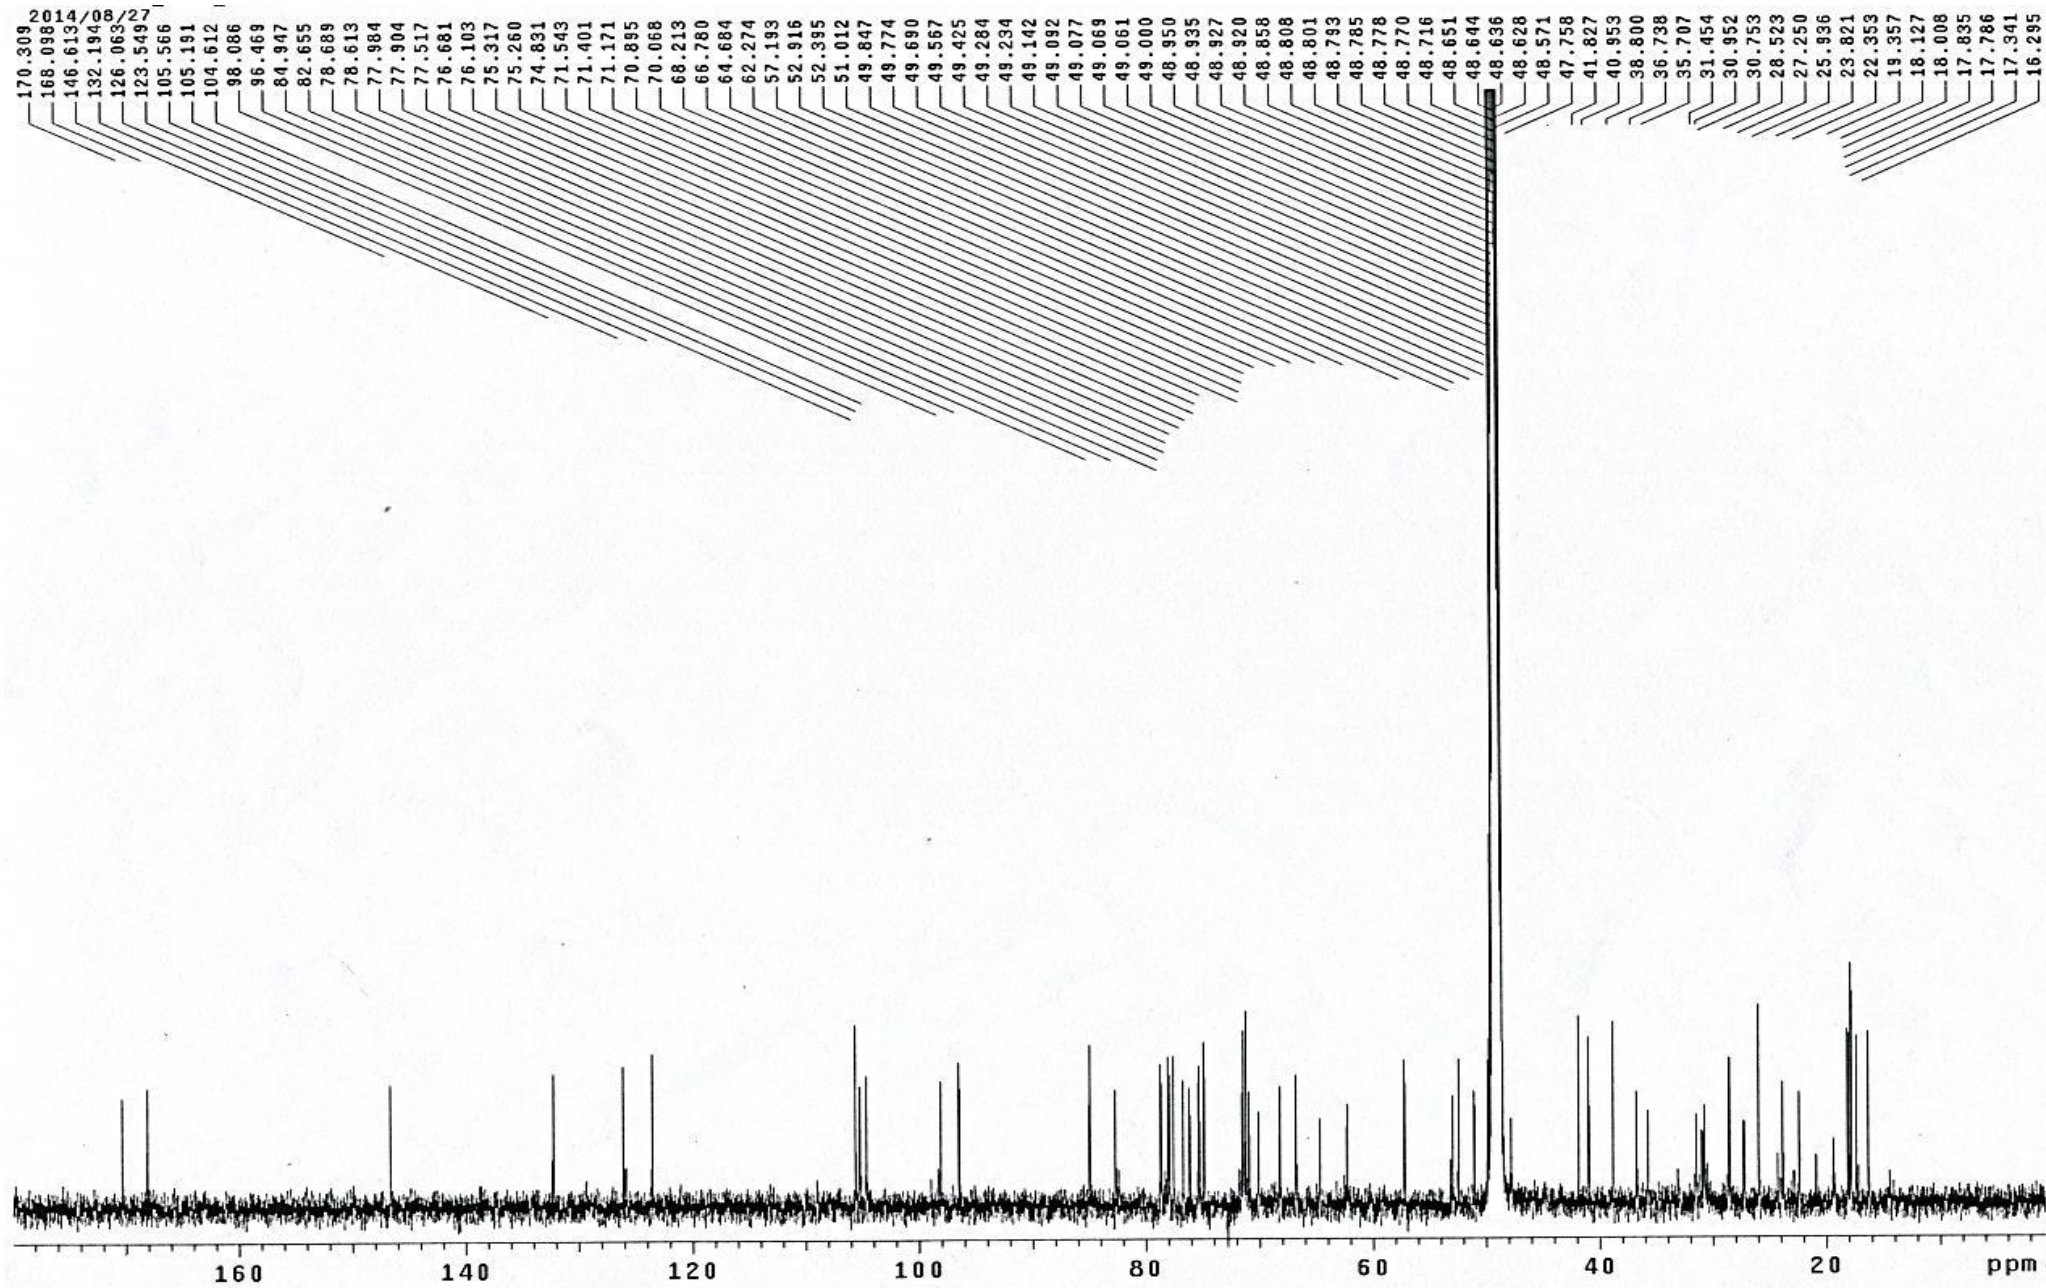

Figure S6. The  $^{13}\text{C}$ -NMR spectrum of Gyenoside CP3 (**3**) (150 MHz in methanol- $d_4$ )

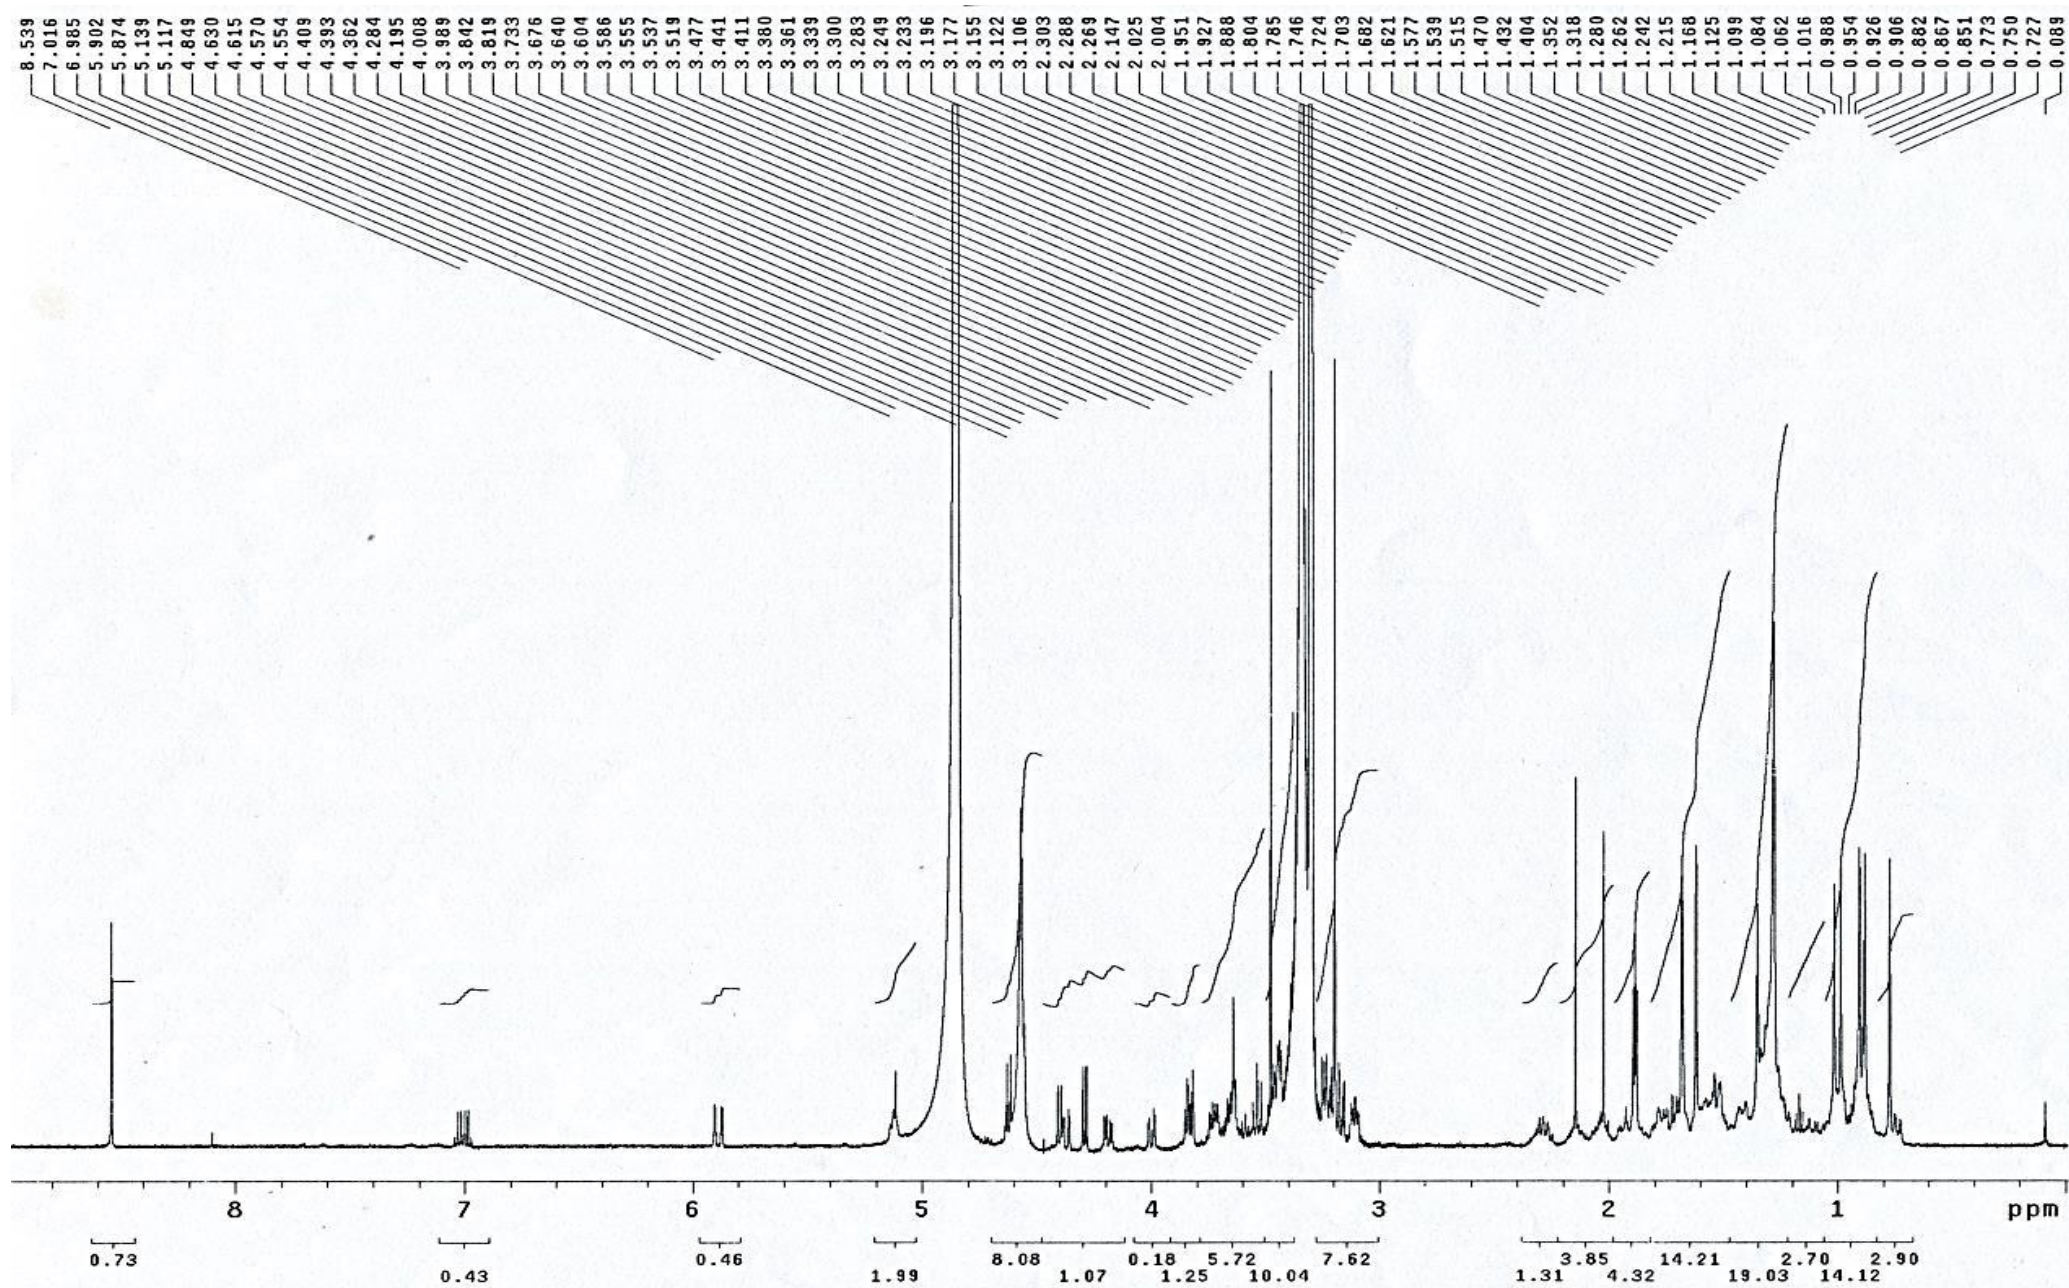

**Figure S7.** The  $^1\text{H}$ -NMR spectrum of Gyenoside CP4 (**4**) (600 MHz in methanol- $d_4$ )



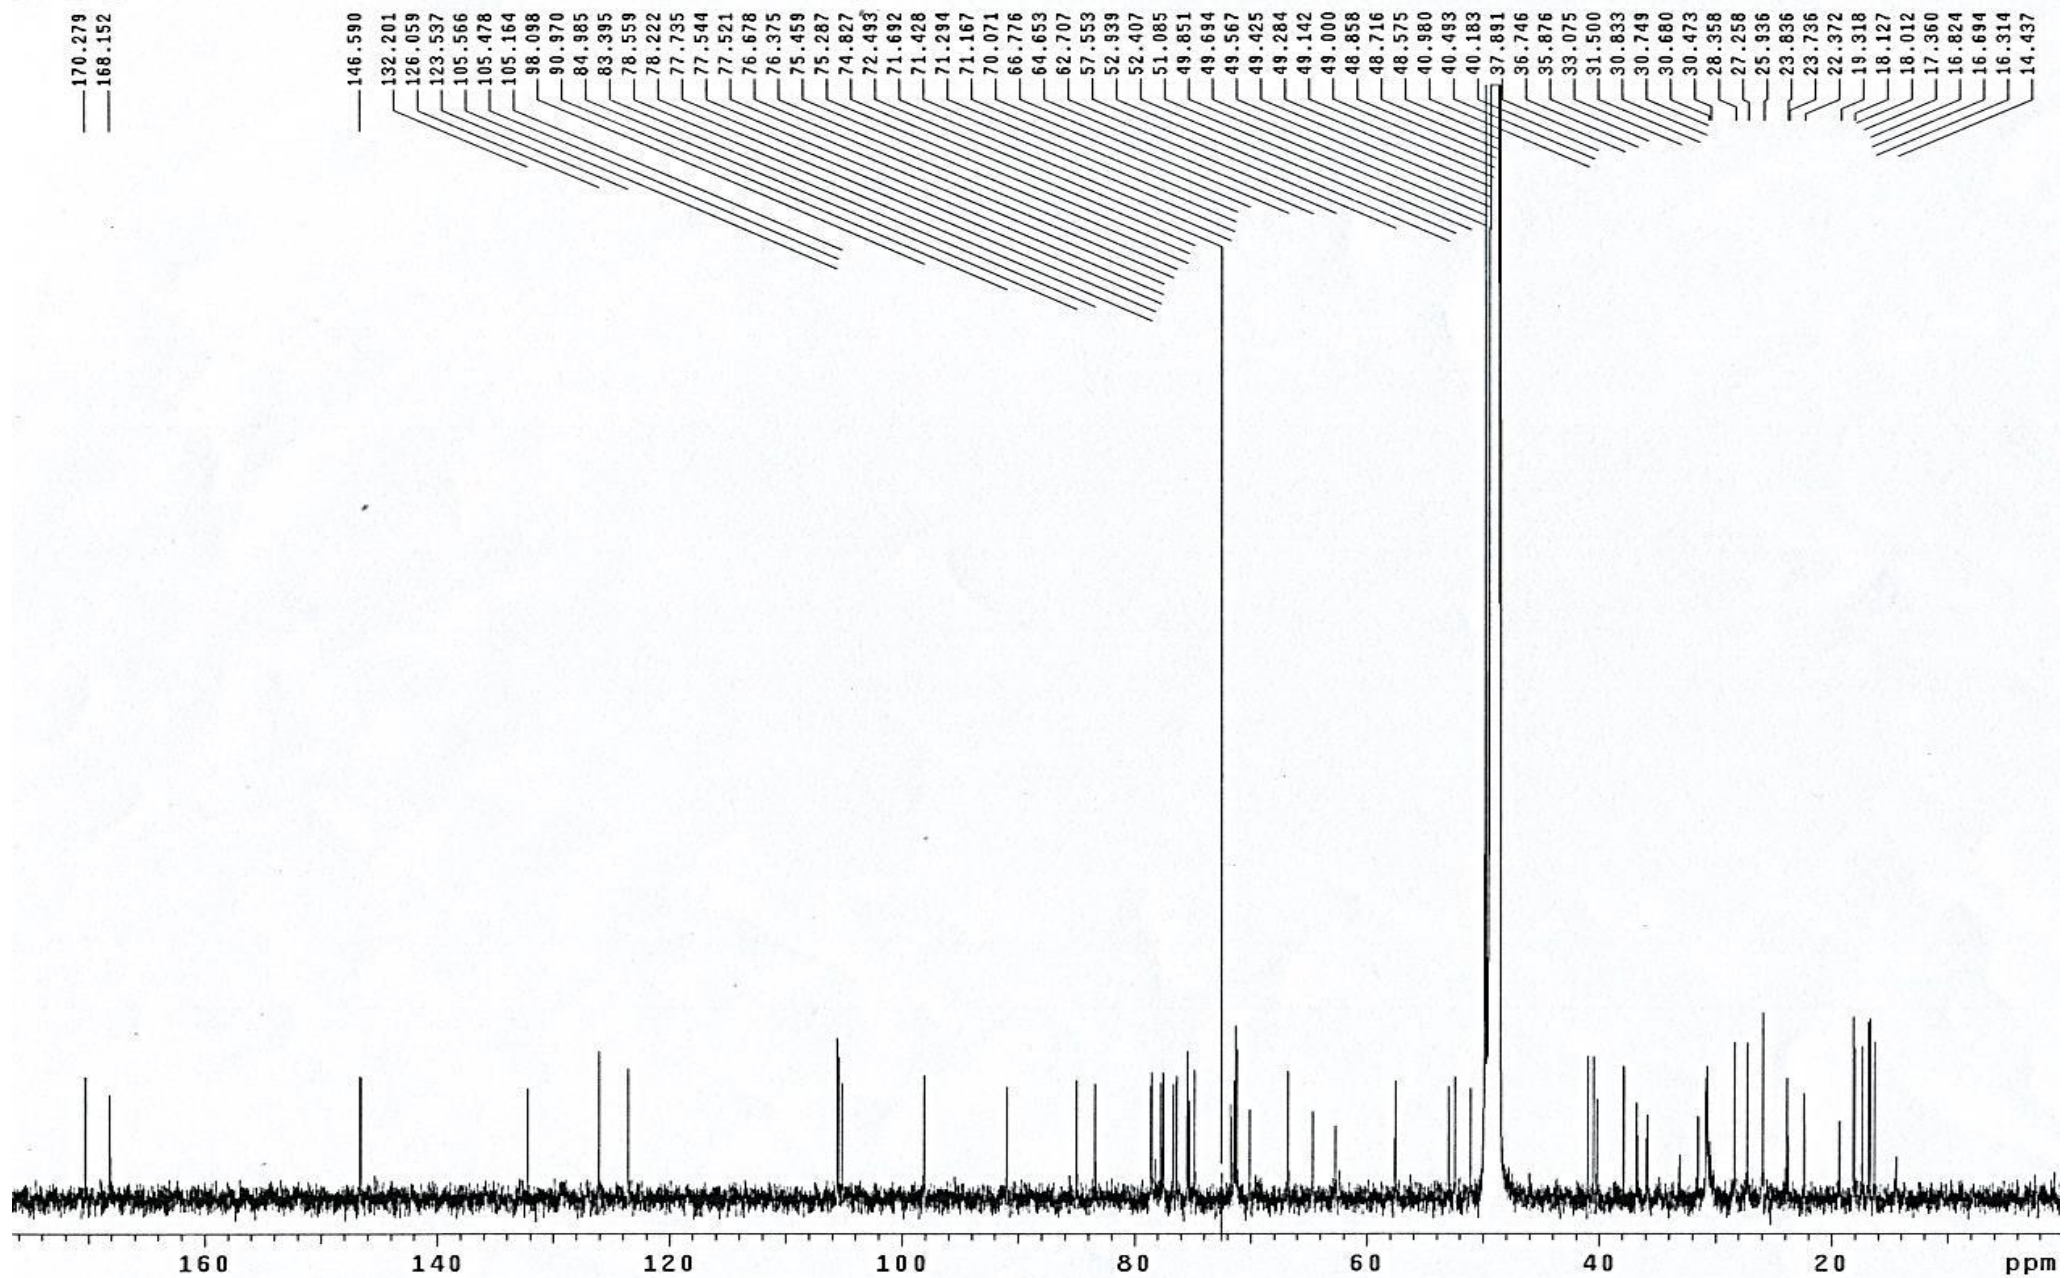

Figure S8. The  $^{13}\text{C}$ -NMR spectrum of Gyenoside CP4 (**4**) (150 MHz in methanol- $d_4$ )

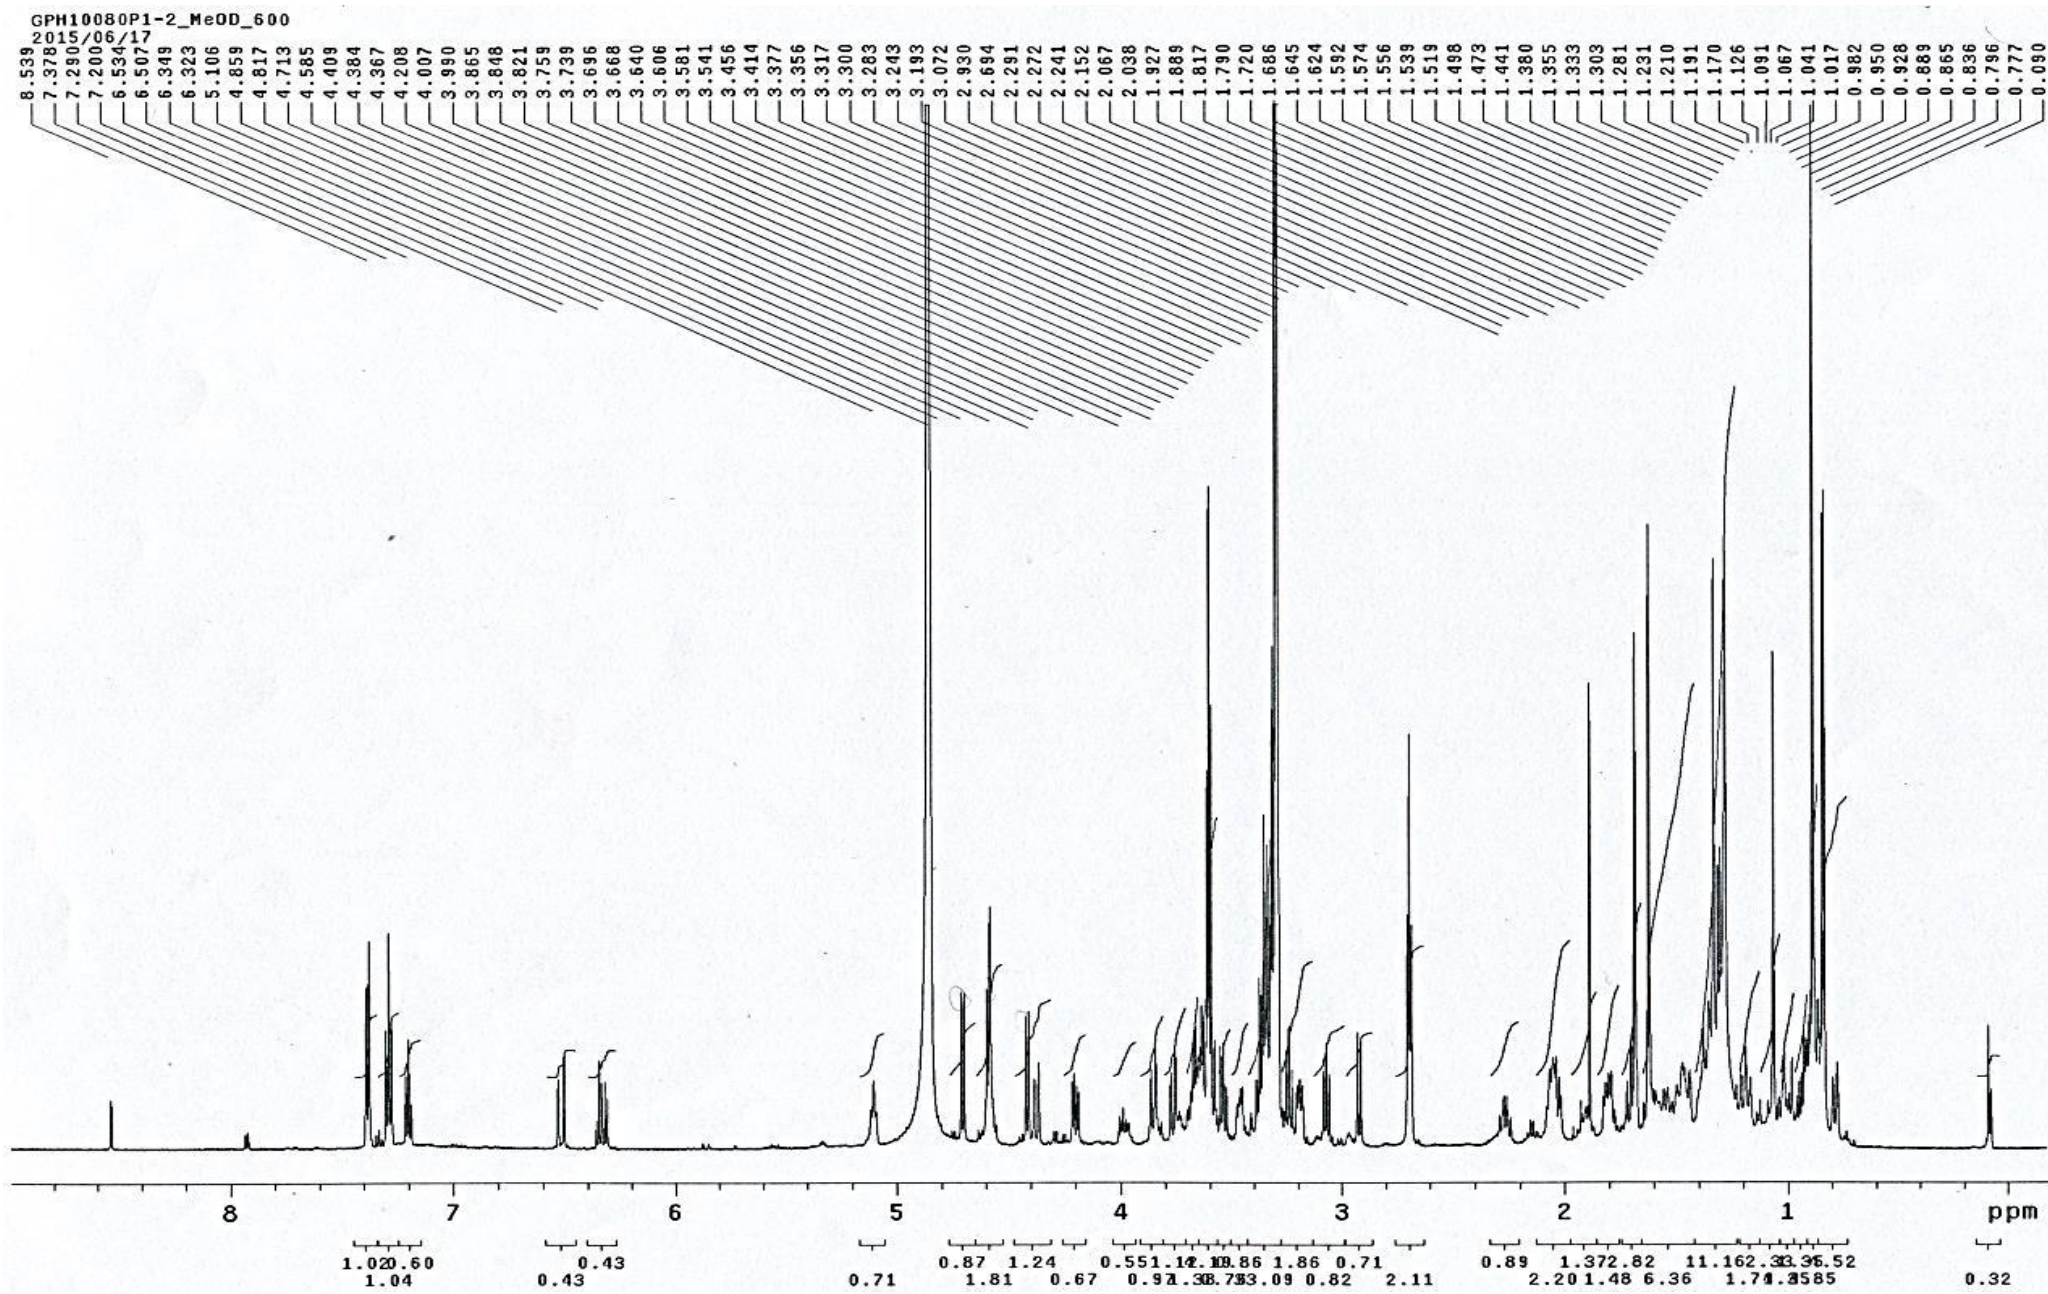

**Figure S9.** The  $^1\text{H}$ -NMR spectrum of Gyenoside CP5 (**5**) (600 MHz in methanol- $d_4$ )

GPH10080P1-2\_MeOD\_600  
2015/06/17

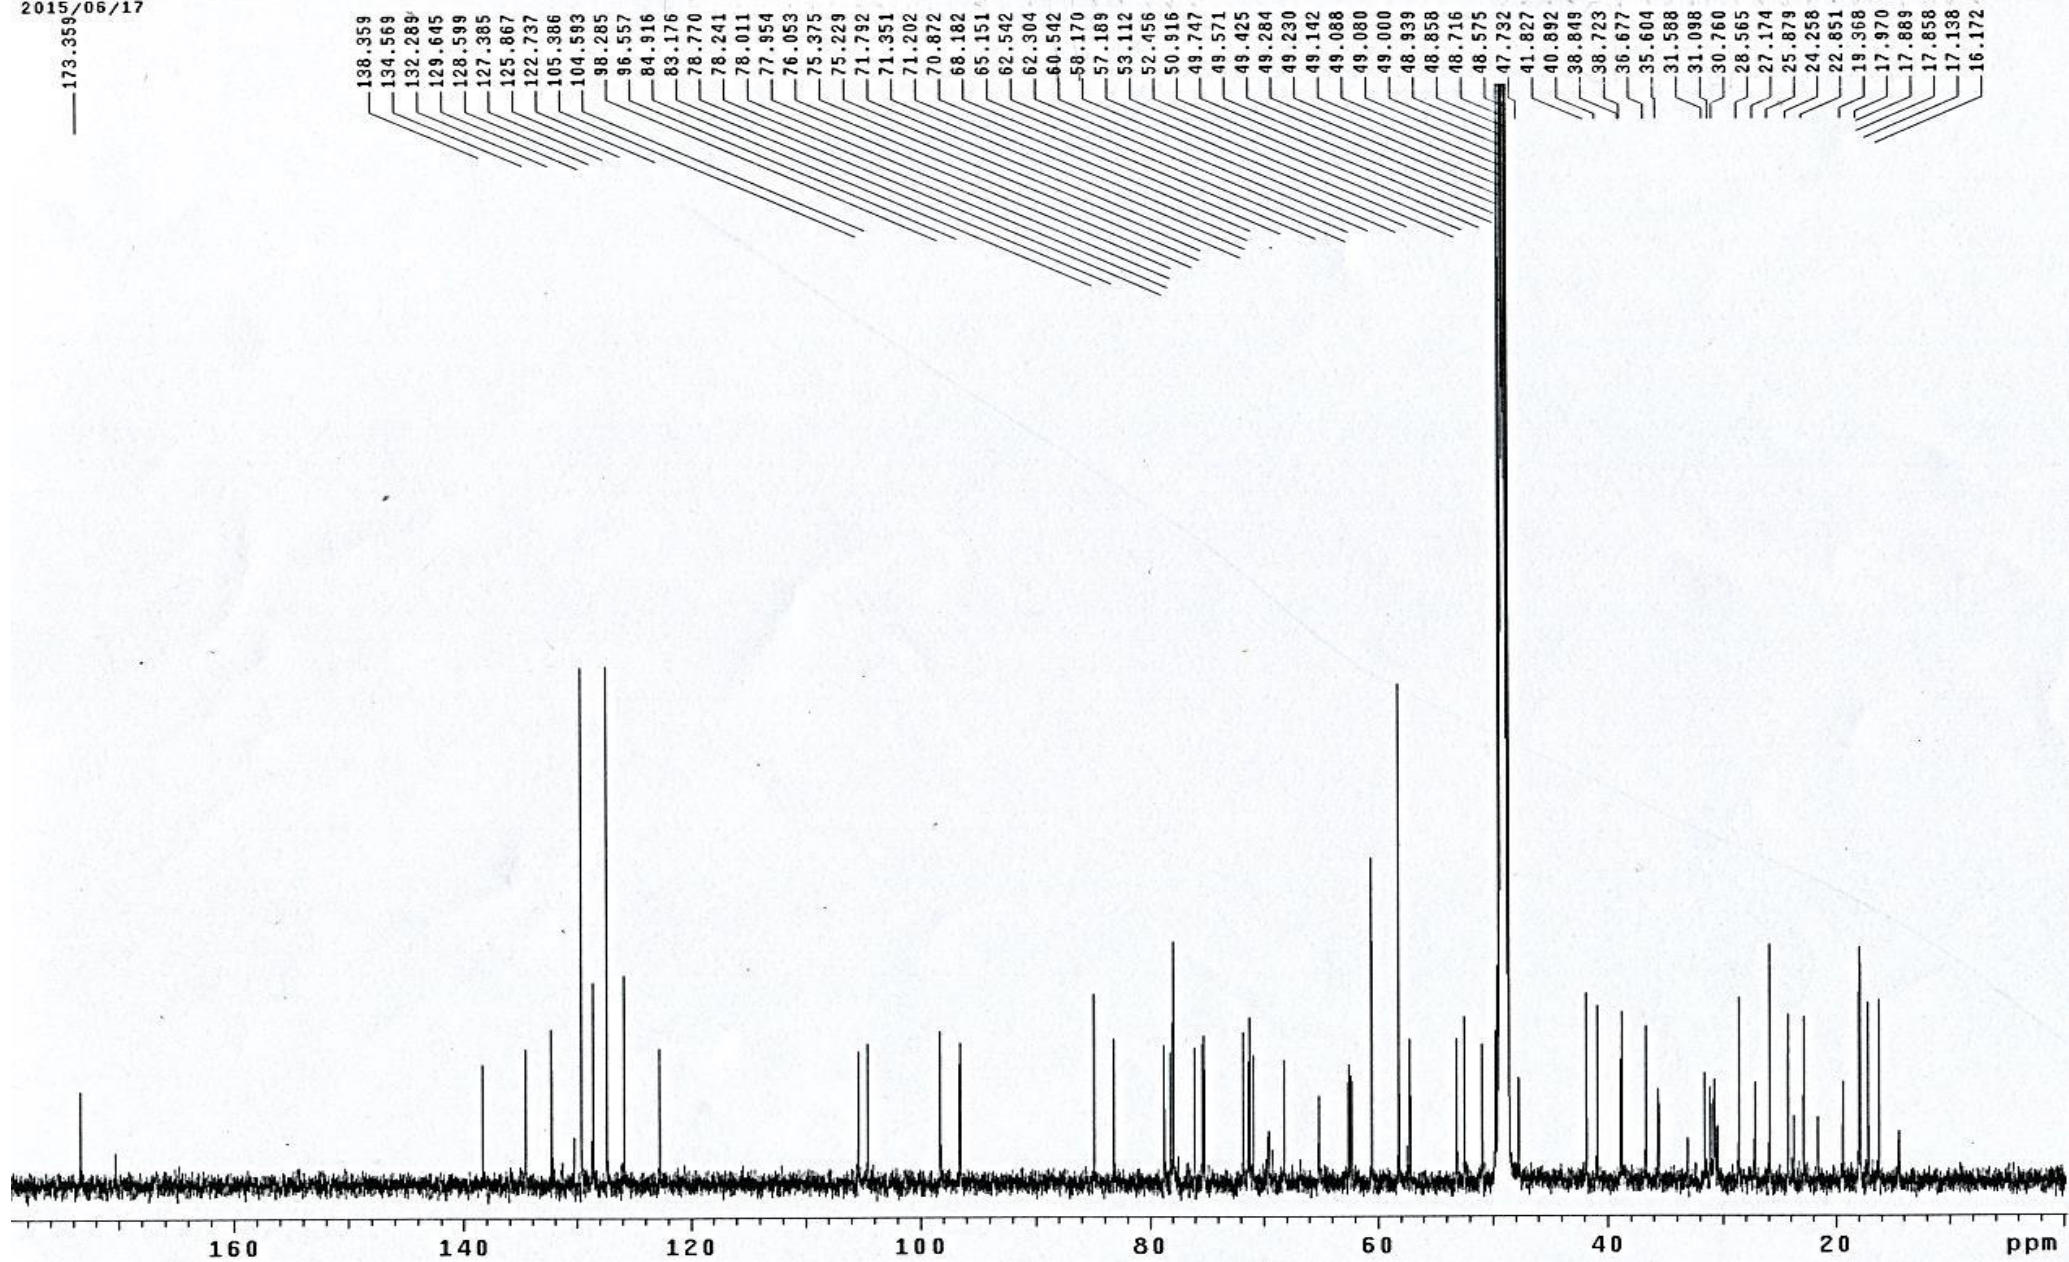

**Figure S10.** The  $^{13}\text{C}$ -NMR spectrum of Gyenoside CP5 (**5**) (150 MHz in methanol- $d_4$ )

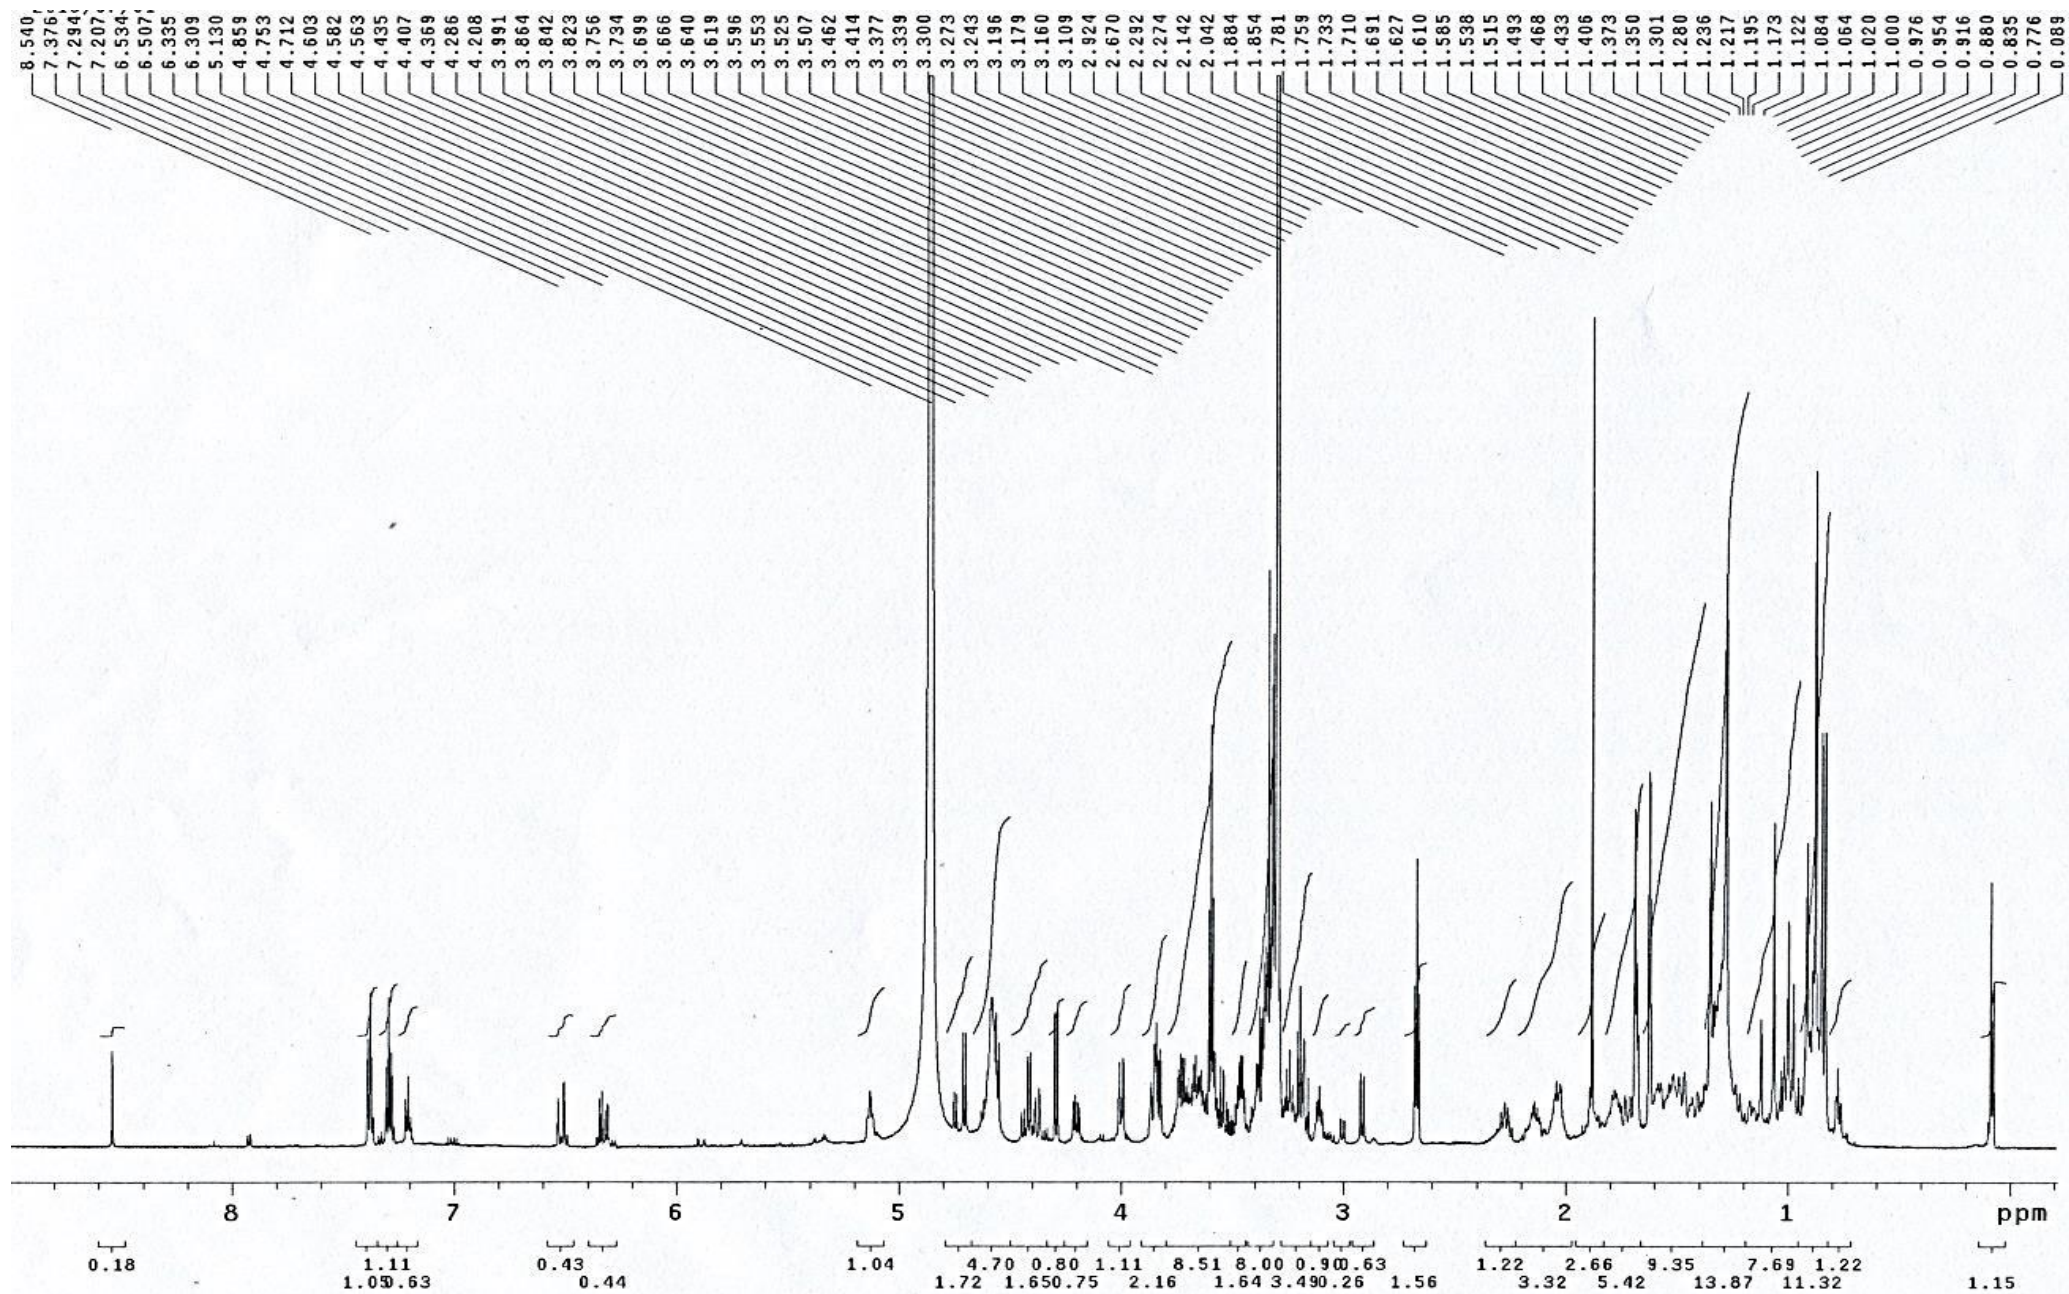

**Figure S11.** The  $^1\text{H}$ -NMR spectrum of Gyenoside CP6 (**6**) (600 MHz in methanol- $d_4$ )

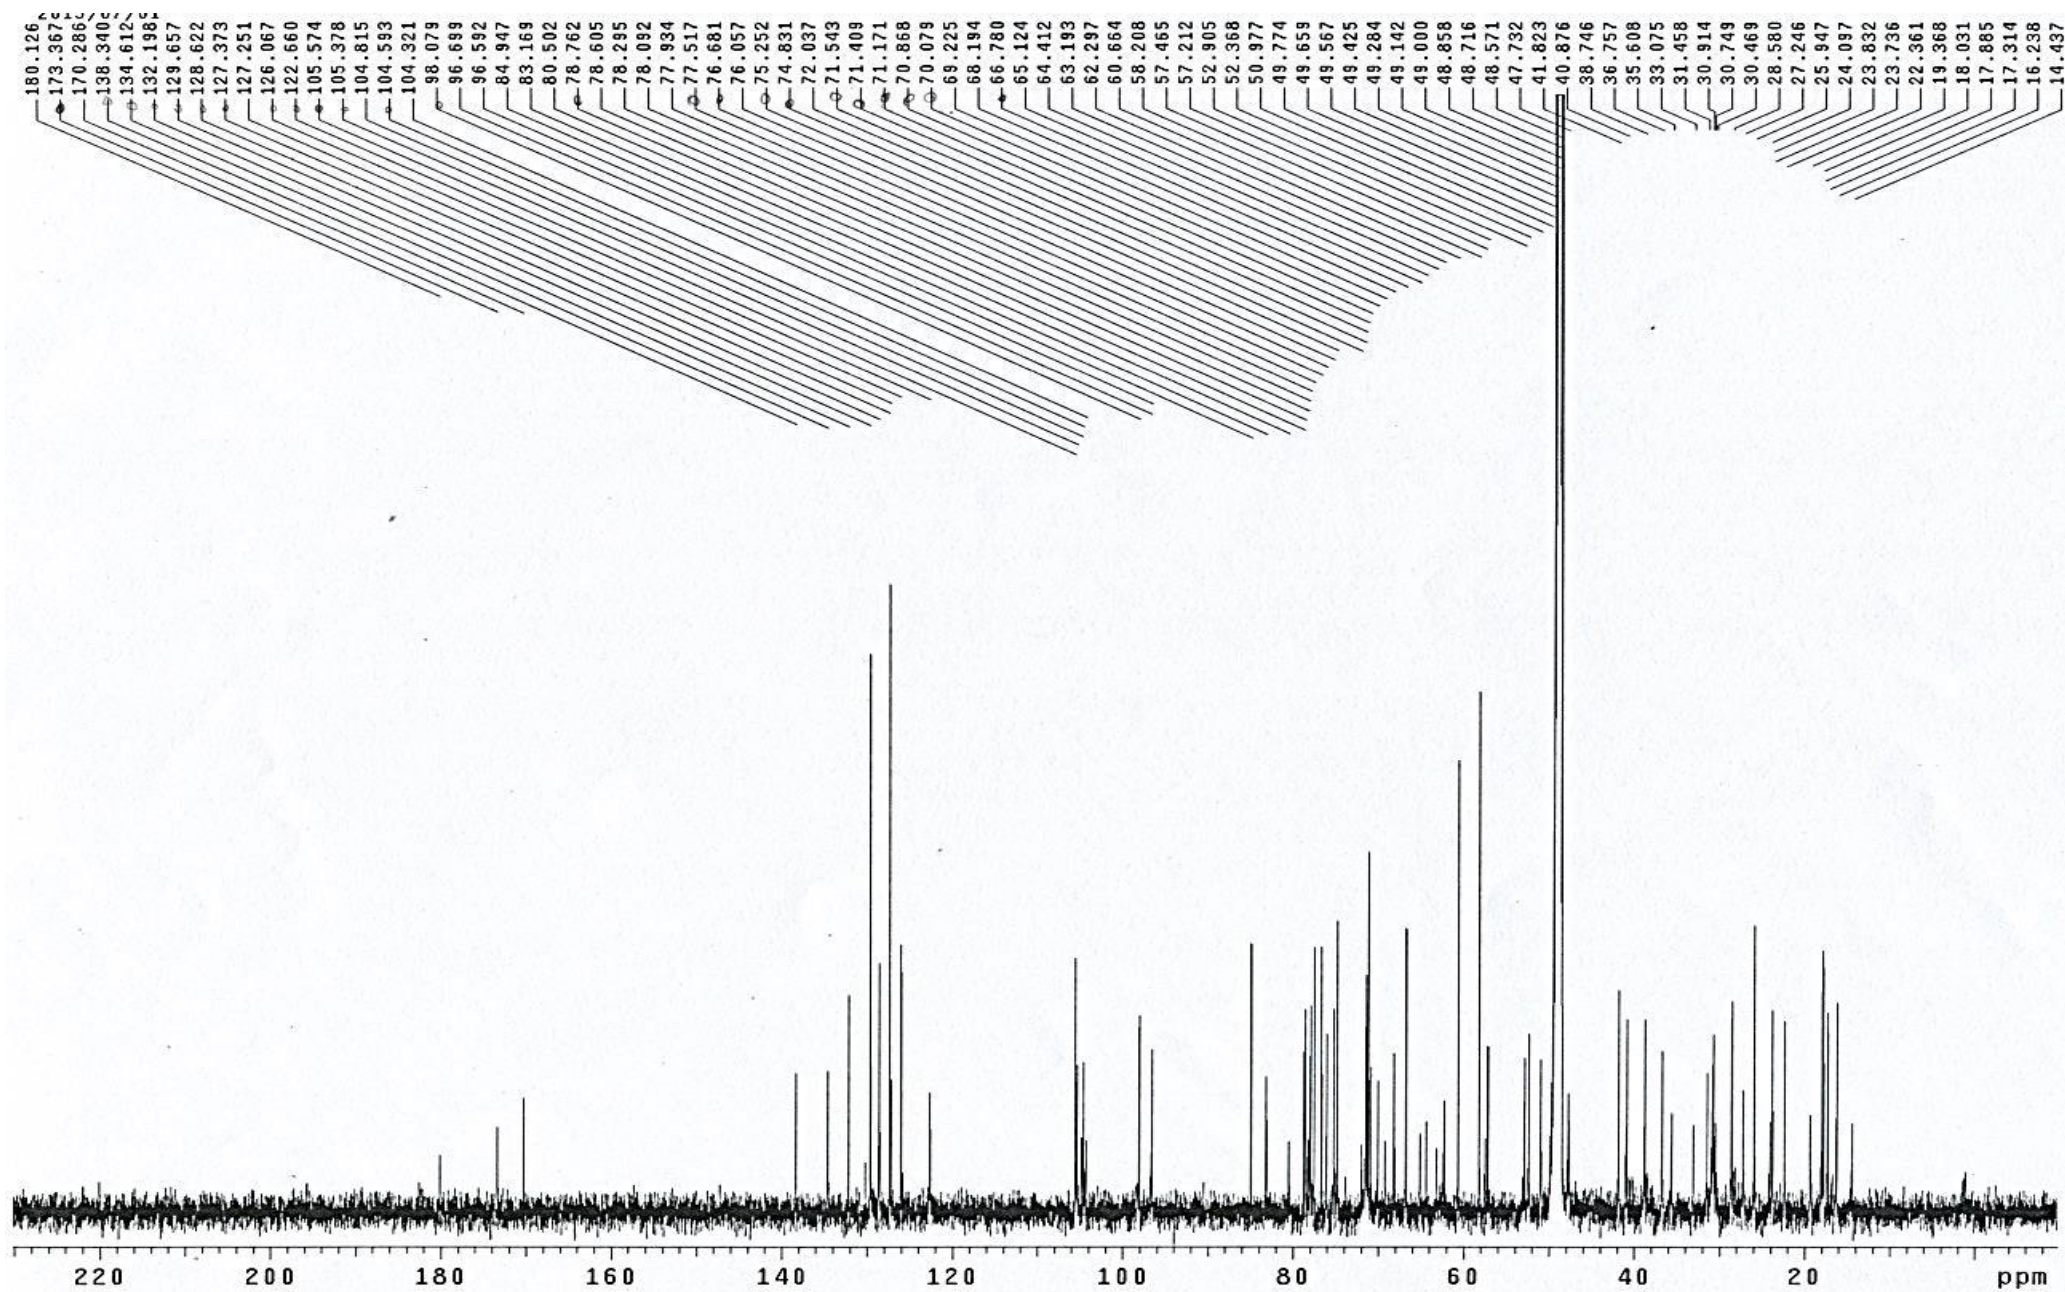

**Figure S12.** The  $^{13}\text{C}$ -NMR spectrum of Gyenoside CP6 (**6**) (150 MHz in methanol- $d_4$ )
